# Supplementary material for: Full-visible-spectrum lighting realized by a novel Eu2+-doped nitride-based cyan-emitting phosphor
Source: Royal Society of Chemistry journal article supplement (doi:10.1039/d1dt01698a), 2021-01-01
Supplement: d1dt01698a1.pdf [file d1dt01698a1.pdf]

## **Full-Visible-Spectrum Lighting Realized by a Novel Eu<sup>2+</sup>-Doped**

### **Nitride-Based Cyan-Emitting Phosphor**

Weibin Zhang,<sup>1,2</sup> Yongwang Li,<sup>1,2</sup> ShanShan Ye,<sup>1</sup> Jiangcong Zhou,<sup>1</sup> Dewu Wu,<sup>1</sup> Chen Shi,<sup>1,2</sup>

Mengting Chen,<sup>1,2</sup> Jianyan Ding,<sup>1\*</sup> and Quansheng Wu,<sup>1\*</sup>

*1. College of Chemistry and Materials Science, Longyan University, Longyan, Fujian 364000, China*

*2. College of Materials Science and Engineering, Fuzhou University, Fujian, 350108, China*

*3. School of Mathematics and Information Engineering, Longyan University, Longyan, Fujian 364000*

**\*Address correspondence to E-mail:** [dingjy1991@qq.com](mailto:dingjy1991@qq.com), [wuqsh1989@qq.com](mailto:wuqsh1989@qq.com).

Total number of pages: 5 (S1-S5)

Total number of Tables: 2 (Table S1- S3)

# Supporting Information

## Material synthesis

The  $\text{Ca}_2\text{BN}_2\text{Cl}:\text{Eu}^{2+}$  samples were prepared by high-temperature solid-phase reaction. The raw materials are  $\text{Eu}_2\text{O}_3$  (99.99%),  $\text{CaCl}_2$  (analytical reagent),  $\text{BN}$  (99%),  $\text{Ca}_3\text{N}_2$  (99%). First, the raw materials were weighed in stoichiometric ratios and then ground in an agate mortar. The grinding process was carried out in a glove box filled with 99.99% high-purity nitrogen. Second, the ground powders were put into an alumina crucible, and then transferred to a vacuumized high-temperature muffle furnace. High-purity nitrogen and hydrogen (95% $\text{N}_2$ /5% $\text{H}_2$ ) are introduced into the high-temperature muffle furnace. Finally, the temperature is increased to 1100°C at a rate of 5°C per minute, and the temperature is kept for 4 hours. After sintering, the bulk samples were obtained and reground into powders in a porcelain mortar for further analysis.

## Measurements and characterization

The phase purity and crystal structure of the  $\text{Ca}_2\text{BN}_2\text{Cl}:\text{xEu}^{2+}$  phosphor was characterized by powder X-ray diffraction (PXRD), which measurement angle range was 10-80°, the measurement step length was 0.03°. The crystal structure of the  $\text{Ca}_2\text{BN}_2\text{Cl}$  was refined through using the general structure analysis system software (GSAS) [18]. The electronic structure of the  $\text{Ca}_2\text{BN}_2\text{Cl}$  was analyzed through using the basic theory of the generalized gradient approximation (GGA) based on density functional theory (DFT).

The sample of  $\text{Ca}_2\text{BN}_2\text{Cl}$  photoluminescence excitation (PLE) and photoluminescence (PL) spectra, fluorescence decay curves, time-resolved photoluminescence (TRPL) and temperature-dependent spectra were recorded by using an FS5 fluorescence spectrometer. The morphology characterized and elemental mapping information was obtained using X-ray spectroscopy (EDX) and scanning electron (SEM, S-340, Hitachi, Japan) respectively.

Table S1. Crystal data on the Ca<sub>2</sub>BN<sub>2</sub>Cl acquired via Rietveld refinement.

| Formula         | Ca <sub>2</sub> BN <sub>2</sub> Cl                 |     |        |       |                |
|-----------------|----------------------------------------------------|-----|--------|-------|----------------|
| Space group     | Pnma (62)                                          |     |        |       |                |
| Cell parameters | a = 11.6576(1) Å, b = 3.891(1) Å<br>c = 8.965(1) Å |     |        |       |                |
| Cell volume     | $V = 406.65(11) \text{ \AA}^3$                     |     |        |       |                |
| Z               | 4                                                  |     |        |       |                |
| Atom            | x/a                                                | y/b | z/c    | Wyck. | Occupancy rate |
| Ca1             | 0.0896                                             | 1/4 | 0.6090 | 4c    | 1              |
| Ca2             | 0.6697                                             | 1/4 | 0.4503 | 4c    | 1              |
| Cl1             | 0.4388                                             | 1/4 | 0.3474 | 4c    | 1              |
| N1              | 0.2865                                             | 1/4 | 0.6846 | 4c    | 1              |
| N2              | 0.8776                                             | 1/4 | 0.5434 | 4c    | 1              |
| B1              | 0.3353                                             | 1/4 | 0.8189 | 4c    | 1              |

Table S2. Value of  $R_i$  for Ca<sub>1</sub>/Eu<sub>1</sub> and Ca<sub>2</sub>/Eu<sub>2</sub>.

| Ca <sub>1</sub> /Eu <sub>1</sub> |         | Ca <sub>2</sub> /Eu <sub>2</sub> |         |
|----------------------------------|---------|----------------------------------|---------|
| N <sub>1</sub>                   | 2.408 Å | N <sub>1</sub>                   | 2.347 Å |
| N <sub>2</sub>                   | 2.393 Å | N <sub>2</sub>                   | 2.564 Å |
| N <sub>3</sub>                   | 2.408 Å | N <sub>3</sub>                   | 2.347 Å |
| N <sub>4</sub>                   | 2.540 Å | Cl <sub>1</sub>                  | 2.945 Å |

|                 |          |                 |          |
|-----------------|----------|-----------------|----------|
| Cl <sub>1</sub> | 2.909 Å  | Cl <sub>2</sub> | 2.845 Å  |
| Cl <sub>2</sub> | 2.909 Å  | Cl <sub>3</sub> | 2.945 Å  |
| Av bond         | 2.5945 Å | Av bond         | 2.6655 Å |

Table S3 PL properties of Ce<sup>3+</sup>/Eu<sup>2+</sup> doped cyan phosphor.

| Phosphor                                                                           | Synthesis | FWHM/nm | TQ(150 °C) | Reference |
|------------------------------------------------------------------------------------|-----------|---------|------------|-----------|
| Ca <sub>2</sub> YHf <sub>2</sub> Al <sub>3</sub> O <sub>12</sub> :Ce <sup>3+</sup> | 1600°C    | 100     | 64.5%      | 32        |
| Lu <sub>4</sub> SiAlO <sub>8</sub> N: Ce <sup>3+</sup>                             | 1400°C    | 120     | 50%        | 33        |
| Li <sub>2</sub> CaSiO <sub>4</sub> :Eu <sup>2+</sup>                               | 800°C     | 37      | 60%        | 34        |
| K <sub>2</sub> ZrSi <sub>3</sub> O <sub>9</sub> :Eu <sup>2+</sup>                  | 800°C     | 57      | 65%        | 35        |
| Al <sub>9</sub> O <sub>3</sub> N <sub>7</sub> :Eu <sup>2+</sup>                    | 1950°C    | 67      | 86%        | 36        |
| YScSi <sub>4</sub> N <sub>6</sub> C: Ce <sup>3+</sup>                              | 2000°C    | 89      | 48%        | 37        |
| Ca <sub>2</sub> BN <sub>2</sub> Cl:Eu <sup>2+</sup>                                | 1100°C    | 121     | 60%        | this work |

#### Some formulas used in this article:

As exhibited in Fig. 3 (d) inset, the band gap value of Ca<sub>2</sub>BN<sub>2</sub>Cl can be attained by the Kubelka–Munk method: [21]

$$F(R) = \frac{(1 - R)^2}{2R} \quad (1)$$

$$[F(R)hv]^2 = \kappa(hv - E_g) \quad (2)$$

where R represents the reflectance measured in DRS,  $hv$  is the incident photon energy, and  $\kappa$  is a constant. As described in Fig. 3 (d), the experimental band-gap value of Ca<sub>2</sub>BN<sub>2</sub>Cl is 3.99 eV.

As afforded in Fig. 4 (d), the connection of Ln ( $I/x$ ) and Ln ( $x$ ) of the Ca<sub>2</sub>BN<sub>2</sub>Cl can be attained by the Van Uitert and Dexter method: [23-24]

$$I/x = K[1 + \beta(x)^{\frac{\theta}{3}}]^{-1} \quad (3)$$

where  $I$  corresponds to the emission intensity,  $x$  represents the content of the activator ions,  $\beta$  and  $K$  are constants, and  $\theta = 6, 8$  and  $10$  refer to dipole-dipole, dipole-quadrupole and quadrupole-quadrupole interactions, respectively. The relationship of  $\ln(I/x)$  on  $\ln(x)$  was fitted with a linear function and the slope of the fitted linear was about 1.50, as exhibited in Fig. 4 (d). The value of  $\theta$  is calculated to be 4.5 closing to 6, implying that concentration quenching is caused by the dipole-dipole interaction.

As depicted in Fig. 5 (a), the average lifetime of  $\text{Ca}_2\text{BN}_2\text{Cl: Eu}^{2+}$  can be calculated by the below equation: [25]

$$\tau = \frac{(A_1\tau_1^2 + A_2\tau_2^2)}{(A_1\tau_1 + A_2\tau_2)} \quad (4)$$

where  $A_1$  and  $A_2$  are the constants;  $\tau_1$  and  $\tau_2$  refers to the short and long lifetime, respectively. Therefore, the average lifetime  $\tau$  of  $\text{Ca}_2\text{BN}_2\text{Cl: } x\text{Eu}^{2+}$  ( $0.01 \leq x \leq 0.05$ ) can be received through the above formula, which is calculated to be about 567.6, 565.3, 551.9, 550.8 and 542.8 ns.

As displayed in Fig. 6 (a) inset, the thermal activation energy of sample is calculated by the following equation: [26]

$$I_T = \frac{I_0}{[1 + A \exp\left(\frac{-\Delta E}{kT}\right)]} \quad (5)$$

where  $I_0$  and  $I_T$  are the emission intensity at initial temperature and a temperature  $T$ , respectively;  $\Delta E$  represents the thermal activation energy;  $k$  and  $A$  are constants. According to the above formula, the thermal activation energy of  $\text{Ca}_2\text{BN}_2\text{Cl: Eu}^{2+}$  was calculated to be 0.2179 eV.
